# Supplementary material for: Highly selective separation of tetravalent plutonium from complex system with novel phenylpyridine diamide ligands
Source: Royal Society of Chemistry journal article supplement (doi:10.1039/d3ra07418h), 2024-01-01
Supplement: d3ra07418h1.pdf [file d3ra07418h1.pdf]

## Supplementary Information

### Highly selective extraction of tetravalent plutonium from complex system with novel phenylpyridine diamide ligands

Liu Yao, Wang Junli, Le Yuhang, Wang Hui, Wang Wentao, Li Baole and Yan

Taihong\*

Department of Radiochemistry, China Institute of Atomic Energy, P.O. Box 275-26, Beijing 102413, P.R. China

#### 1. Synthesis routes

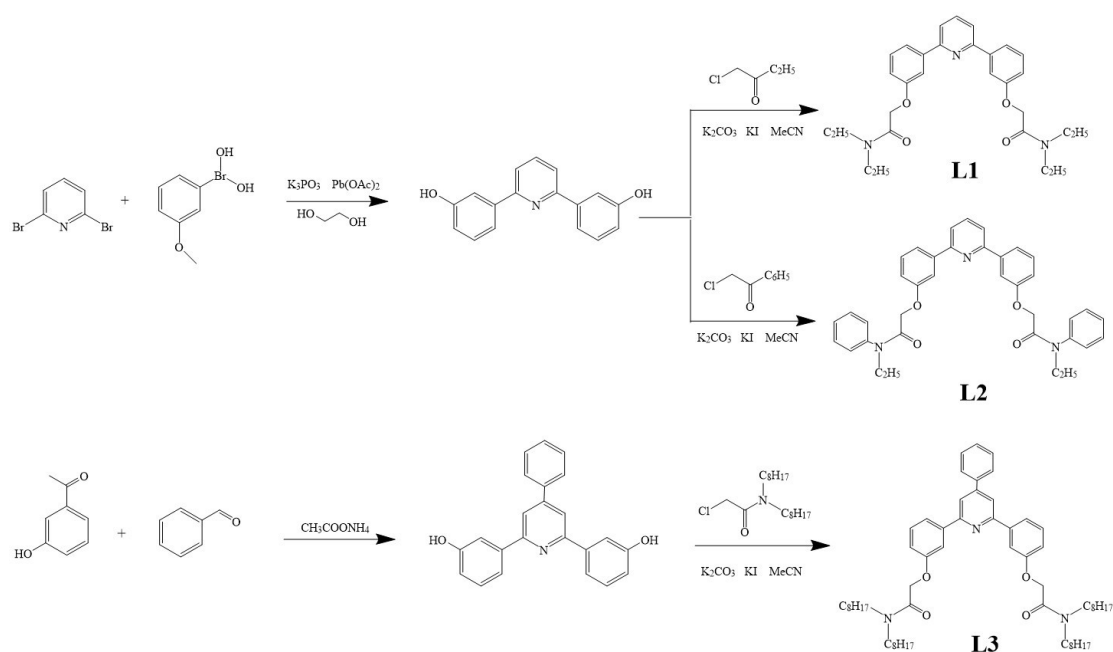

**Fig. S1** Synthesis routes of L1 (PPEA), L2 (PEPA), and L3 (PPOA)

#### L1 (PPDA) and L2 (PEPA)

2,6-Dibromopyridine (10.39 g), dihydroxy(3-methoxyphenyl)-bromane (20 g), and potassium phosphate (27.93 g) were added to ethylene glycol (350 mL) under the protection of an Ar atmosphere. After stirring for 5 min, palladium acetate (0.057 g) was added and reacted at 80 °C for 3 h. Once the solution had cooled to 25 °C, ethyl

---

acetate (500 mL) was added. The mixture was washed three times with saturated salt water to obtain intermediate product **A** (2,6-bis(3-methoxyphenyl)pyridine). Subsequently, pyridine hydrochloride (22.5 g) was heated and melted in an Ar atmosphere, followed by the addition of compound **A** (4.6 g). The reaction was carried out at 200 °C for 16 h. Then, the reaction solution was poured into ice water and stirred thoroughly to obtain intermediate product **B** (3,3'-(pyridine-2,6-diyl)diphenol). Next, potassium carbonate (15.74 g) and potassium iodide (3.2 g) were added to acetonitrile (200 mL) with constant stirring for 15 min. Then, compound **B** (10 g) was added with continuous stirring at room temperature for 30 min, followed by the addition of chloroacetamide. The reaction was carried out at 85 °C for 16 h. Finally, after washing with saturated salt water, the organic phase was separated and purified through a column to obtain 2,2'-((pyridine-2,6-diylbis(3,1-phenylene))bis(oxy))bis(*N,N*-diethylacetamide) (PPEA, **L1**) and 2,2'-((pyridine-2,6-diylbis(3,1-phenylene))bis(oxy))bis(*N*-ethyl-*N*-phenylacetamide) (PEPA, **L2**).

### **L3 (PPOA)**

Benzaldehyde (6.12 mL), 3-hydroxyacetophenone (16.33 g), and ammonium acetate (60 g) were added to glacial acetic acid (150 mL) and refluxed for 3 h. Then, the product was dissolved in ether and extracted with water (10 mL) three times. After the organic phase was removed, the product was recrystallized with an ether/petroleum ether mixture (1:1, v/v) and dried at 30 °C to obtain intermediate product **A** (3,3'-(4-phenylpyridine-2,6-diyl)diphenol). Next, potassium carbonate (15.74 g) and potassium iodide (3.2 g) were added to acetonitrile (200 mL) and stirred for 15 min. Subsequently, intermediate product **A** (13 g) was added with stirring at room temperature for 30 min, followed by the addition of chloroacetyl-di-*n*-octylamine (26 g). The reaction was carried out at 85 °C for 16 h. Finally, after washing with saturated salt water, the organic phase was separated and purified through a column to obtain 2,2'-(((4-phenylpyridine-2,6-diyl)bis(3,1-phenylene))bis(oxy))bis(*N,N*-dioctylacetamide) (PPOA, **L3**).



**Fig. S2**  $^1\text{H}$  NMR spectra of **L1** (PPEA), **L2** (PEPA), and **L3** (PPOA) in  $\text{CDCl}_3$ .

Characterization data:  $^1\text{H}$  NMR (400 MHz,  $\text{CDCl}_3$ , ppm)

### 3. Solvent extraction

**Table S1** Pu(IV) stripping efficiency of **L1** (PPEA) in 1-(trifluoromethyl)-3-nitrobenzene using five stripping agents

| Stage                | Stripping agent           |                         |                                     |                                                                 |                                    |
|----------------------|---------------------------|-------------------------|-------------------------------------|-----------------------------------------------------------------|------------------------------------|
|                      | 0.2 M DMHAN–<br>0.1 M MMH | 0.2 M<br>$\text{HNO}_3$ | 0.1 M EDTA–<br>0.5 M $\text{HNO}_3$ | 0.2M $\text{H}_2\text{C}_2\text{O}_4$ –<br>0.5 M $\text{HNO}_3$ | 0.2 M AHA–<br>0.5 M $\text{HNO}_3$ |
| 1                    | 85.4%                     | 82.3%                   | 83.4%                               | 77.1%                                                           | 83.2%                              |
| 2                    | 73.6%                     | 74.2%                   | 81.2%                               | 69.4%                                                           | 81.4%                              |
| 3                    | 78.9%                     | 77.8%                   | 71.1%                               | 71.4%                                                           | 76.5%                              |
| Total after 3 stages | 99.2%                     | 99.0%                   | 99.1%                               | 98.0%                                                           | 99.3%                              |

**Table S2** Pu(IV) stripping efficiency of **L3** (PPOA) in 1-(trifluoromethyl)-3-nitrobenzene using five stripping agents

| Stage                | Stripping agent           |                         |                                     |                                                                 |                                    |
|----------------------|---------------------------|-------------------------|-------------------------------------|-----------------------------------------------------------------|------------------------------------|
|                      | 0.2 M DMHAN–<br>0.1 M MMH | 0.2 M<br>$\text{HNO}_3$ | 0.1 M EDTA–<br>0.5 M $\text{HNO}_3$ | 0.2M $\text{H}_2\text{C}_2\text{O}_4$ –<br>0.5 M $\text{HNO}_3$ | 0.2 M AHA–<br>0.5 M $\text{HNO}_3$ |
| 1                    | 82.5%                     | 81.6%                   | 77.5%                               | 72.5%                                                           | 81.8%                              |
| 2                    | 72.1%                     | 73.5%                   | 83.2%                               | 65.3%                                                           | 72.5%                              |
| 3                    | 80.6%                     | 80.3%                   | 81.9%                               | 76.8%                                                           | 80.2%                              |
| Total after 3 stages | 99.1%                     | 99.0%                   | 99.3%                               | 97.8%                                                           | 99.0%                              |

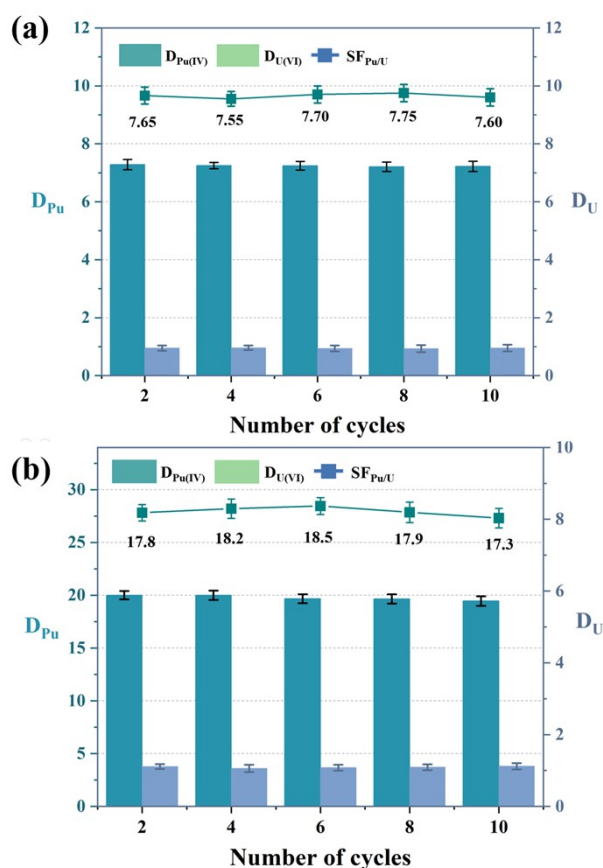

**Fig. S3** Reusability of extractants (a) L2 (PEPA) and (b) L3 (PPOA). Organic phase: 0.05 M ligand in 1-(trifluoromethyl)-3-nitrobenzene; aqueous phase: 3 M  $HNO_3$ , 5 mg/L Pu(IV), and 1 g/L U(VI).

#### 4. Radiation stability

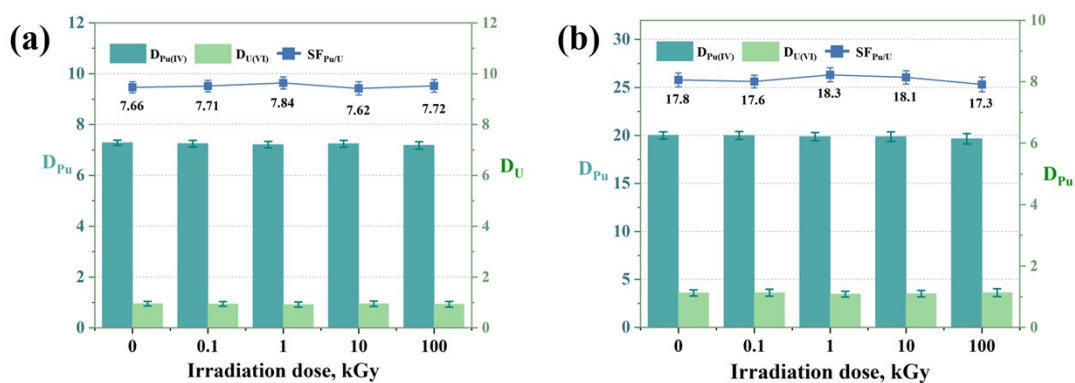

**Fig. S4** Extraction of Pu(IV) and U(VI) using ligands (a) L1 (PPEA) and (b) L3 (PPOA) exposed to different  $\gamma$  radiation doses. Organic phase: 0.05 M ligand in 1-(trifluoromethyl)-3-nitrobenzene; aqueous phase: 3 M  $HNO_3$ , 5 mg/L Pu(IV), and 1 g/L U(VI).
